# Supplementary material for: Global Methylation Profiling for Risk Prediction of Prostate Cancer
Source: Oxford University Press journal article supplement (doi:10.1158/1078-0432.ccr-11-2090), 2012-05-14
Supplement: 10780432ccr112090-sup-t3_xls_43k.xls [file 10780432ccr112090-sup-t3_xls_43k.xls]

## Sheet: Sheet1
Table S3.
Gene	H Ratio	Low CI	Up CI	p-value	q value	GENE_ID
FLJ30934	1.16559	1.11366	1.21995	4.41886e-11	6.28068e-07	GeneID:254122
FLNC	1.14391	1.09654	1.19333	4.62544e-10	3.28714e-06	GeneID:2318
AMID	1.17674	1.11274	1.24441	1.16525e-08	5.5207e-05	GeneID:84883
NEUROG1	1.19416	1.12293	1.26991	1.56049e-08	5.54496e-05	GeneID:4762
CD8A	1.14279	1.09007	1.19806	3.04525e-08	8.65662e-05	GeneID:925
C16orf35	0.587863	0.484156	0.713784	8.09565e-08	0.000173171	GeneID:8131
ZNF19	0.553284	0.445527	0.687104	8.5286e-08	0.000173171	GeneID:7567
RCN3	0.755633	0.67845	0.841597	3.44855e-07	0.000612693	GeneID:57333
K6HF	0.693785	0.602148	0.799368	4.22887e-07	0.000628198	GeneID:9119
FLJ20186	0.650295	0.550267	0.768505	4.41978e-07	0.000628198	GeneID:54849
OR12D2	0.763806	0.687649	0.848398	4.96012e-07	0.000640907	GeneID:26529
FLJ42291	0.677991	0.581163	0.790951	7.69977e-07	0.000911995	GeneID:346547
SRD5A2	1.17717	1.10284	1.25651	9.52015e-07	0.00101098	GeneID:6716
SPATA22	0.6907	0.595425	0.801219	1.02644e-06	0.00101098	GeneID:84690
KIR3DL1	0.764303	0.686072	0.851455	1.06693e-06	0.00101098	GeneID:3811
UGDH	1.39255	1.21854	1.59142	1.16102e-06	0.00103137	GeneID:7358
COX8C	0.544007	0.425183	0.696038	1.28641e-06	0.00106006	GeneID:341947
CIAS1	0.797482	0.727398	0.874318	1.42208e-06	0.00106006	GeneID:114548
IFNA14	0.799312	0.729652	0.875623	1.47236e-06	0.00106006	GeneID:3448
HS3ST2	1.12956	1.07428	1.18767	1.94193e-06	0.00131435	GeneID:9956
SPG7	0.786947	0.712643	0.868998	2.19186e-06	0.00141607	GeneID:6687
FMOD	1.16029	1.09045	1.23461	2.68402e-06	0.00160539	GeneID:2331
MGC39681	0.717153	0.624042	0.824157	2.79154e-06	0.00160539	GeneID:283197
FLJ32894	0.735486	0.646746	0.836402	2.82374e-06	0.00160539	GeneID:144360
EXOSC4	0.092872	0.0341723	0.252404	3.17909e-06	0.00168326	GeneID:54512
CALN1	0.682974	0.581729	0.801841	3.19755e-06	0.00168326	GeneID:83698
MAGEC1	0.821914	0.75661	0.892854	3.43141e-06	0.00174185	GeneID:9947
GH2	0.528623	0.403224	0.693021	3.94573e-06	0.00186804	GeneID:2689
PRSS2	0.811716	0.742698	0.887148	4.20093e-06	0.00186804	GeneID:5645
CBX8	2.01832	1.49646	2.72218	4.20573e-06	0.00186804	GeneID:57332
C20orf160	0.757099	0.672355	0.852524	4.33925e-06	0.00186895	GeneID:140706
DNAHL1	0.763612	0.680281	0.857151	4.77362e-06	0.00199556	GeneID:284176
HYAL1	0.619081	0.503685	0.760916	5.21153e-06	0.00204968	GeneID:3373
IFNA1	0.791195	0.715312	0.875129	5.2911e-06	0.00204968	GeneID:3439
SLC9A3	1.141	1.07796	1.20771	5.38007e-06	0.00204968	GeneID:6550
MSLN	0.587227	0.466785	0.738746	5.47991e-06	0.00204968	GeneID:10232
SLURP1	0.667892	0.561003	0.795148	5.72913e-06	0.00208795	GeneID:57152
BLVRA	1.18961	1.1035	1.28243	5.91923e-06	0.0021033	GeneID:644
PMAIP1	0.745989	0.657009	0.84702	6.12328e-06	0.00212274	GeneID:5366
KRTAP17-1	0.779496	0.698821	0.869486	7.86023e-06	0.00262156	GeneID:83902
PTGER2	1.12607	1.06891	1.18629	7.93109e-06	0.00262156	GeneID:5732
CR1	1.18739	1.10075	1.28086	8.87485e-06	0.00280314	GeneID:1378
C6orf48	0.469672	0.336303	0.655931	9.2295e-06	0.00285178	GeneID:50854
TUBA2	0.726503	0.63063	0.836952	9.64347e-06	0.00286622	GeneID:7278
NAPRT1	0.671782	0.563233	0.801252	9.67955e-06	0.00286622	GeneID:93100
SLC25A17	0.452228	0.318051	0.64301	9.9127e-06	0.00287536	GeneID:10478
LOC51315	0.553655	0.425474	0.720453	1.08082e-05	0.00307242	GeneID:51315
FLJ43855	0.684193	0.57759	0.810472	1.12474e-05	0.00310374	GeneID:386757
NPBWR2	0.814938	0.743774	0.892911	1.13551e-05	0.00310374	GeneID:2832
ASB16	0.355973	0.224151	0.565321	1.20378e-05	0.00322825	GeneID:92591
CEACAM6	0.699871	0.596416	0.821273	1.22747e-05	0.00323081	GeneID:4680
APLP1	0.699153	0.595343	0.821065	1.27633e-05	0.00329833	GeneID:333
SMAD9	0.479162	0.34379	0.667839	1.40372e-05	0.00356278	GeneID:4093
SUSD3	1.14577	1.0774	1.21849	1.4605e-05	0.00361264	GeneID:203328
EDNRB	0.712336	0.610952	0.830543	1.48866e-05	0.00361264	GeneID:1910
ETF1	18.1095	4.87913	67.2155	1.49962e-05	0.00361264	GeneID:2107
SH3BGRL	1.16531	1.08701	1.24925	1.62495e-05	0.00384933	GeneID:6451
PFN1	1.79047	1.37324	2.33445	1.68319e-05	0.00385913	GeneID:5216
ECH1	0.736793	0.641098	0.846771	1.68339e-05	0.00385913	GeneID:1891
NKG7	0.716204	0.614996	0.834069	1.7529e-05	0.00393724	GeneID:4818
HSBP1	0.580873	0.453251	0.744429	1.77287e-05	0.00393724	GeneID:3281
RASGRF2	1.12617	1.06657	1.1891	1.84142e-05	0.00394618	GeneID:5924
MUC5B	0.794271	0.71472	0.882675	1.88751e-05	0.00394618	GeneID:4587
PSG6	0.705985	0.601866	0.828116	1.89632e-05	0.00394618	GeneID:5675
MRPL36	0.260995	0.140923	0.483373	1.9373e-05	0.00394618	GeneID:64979
CLEC9A	0.81218	0.738235	0.893531	1.94255e-05	0.00394618	GeneID:283420
MOG	0.727923	0.629215	0.842115	1.94347e-05	0.00394618	GeneID:4340
LOC349136	1.143	1.07488	1.21543	2.0132e-05	0.00402555	GeneID:349136
PMP22	1.33192	1.16724	1.51984	2.07719e-05	0.00402555	GeneID:5376
MFAP5	0.775198	0.68941	0.87166	2.08596e-05	0.00402555	GeneID:8076
CORT	0.672167	0.559753	0.807157	2.09586e-05	0.00402555	GeneID:1325
HBG1	0.809599	0.734411	0.892485	2.16392e-05	0.00410087	GeneID:3047
C18orf14	0.814662	0.741077	0.895555	2.19711e-05	0.00410898	GeneID:79839
STXBP2	0.636087	0.515604	0.784725	2.41455e-05	0.00424357	GeneID:6813
FLJ36046	0.716017	0.613082	0.836234	2.45856e-05	0.00424357	GeneID:164592
KIR2DL1	0.780611	0.695699	0.875887	2.49297e-05	0.00424357	GeneID:3802
GUP1	0.640544	0.520685	0.787994	2.50714e-05	0.00424357	GeneID:57467
RHOT2	1.37692	1.18655	1.59785	2.52074e-05	0.00424357	GeneID:89941
PDHA2	0.661507	0.54571	0.801875	2.56552e-05	0.00424357	GeneID:5161
SIX6	1.11565	1.06021	1.17399	2.57143e-05	0.00424357	GeneID:4990
UNQ473	1.36106	1.17896	1.57129	2.59329e-05	0.00424357	GeneID:284340
ENPP6	0.812918	0.73813	0.895285	2.59468e-05	0.00424357	GeneID:133121
SOCS2	3.70931	2.01334	6.83393	2.61499e-05	0.00424357	GeneID:8835
CCDC19	0.766817	0.677543	0.867854	2.61831e-05	0.00424357	GeneID:25790
MST1R	0.52855	0.392618	0.711546	2.62735e-05	0.00424357	GeneID:4486
ATF5	0.743737	0.647705	0.854007	2.70051e-05	0.00431192	GeneID:22809
FLJ43276	1.9701	1.43513	2.70448	2.73034e-05	0.00431192	GeneID:388165
INT1	0.763803	0.6733	0.86647	2.82123e-05	0.00440649	GeneID:26173
COL9A1	0.825324	0.754292	0.903046	2.90224e-05	0.00444436	GeneID:1297
ARHGAP15	0.784923	0.700678	0.879298	2.90801e-05	0.00444436	GeneID:55843
ACR	0.728243	0.627538	0.84511	2.96363e-05	0.00447451	GeneID:49
FOXI1	0.831426	0.762388	0.906715	2.9907e-05	0.00447451	GeneID:2299
FOXC1	2.11832	1.4882	3.01525	3.08502e-05	0.00453996	GeneID:2296
GJB4	0.692617	0.582708	0.823256	3.09833e-05	0.00453996	GeneID:127534
LIF	0.760596	0.668619	0.865225	3.16205e-05	0.00457767	GeneID:3976
KHSRP	0.399477	0.259178	0.615724	3.22455e-05	0.00457767	GeneID:8570
AGBL2	0.396038	0.255878	0.612971	3.2364e-05	0.00457767	GeneID:79841
SLC5A4	0.816022	0.741395	0.89816	3.2529e-05	0.00457767	GeneID:6527
CNR1	0.728558	0.627401	0.846025	3.28982e-05	0.00458425	GeneID:1268
MAGEB2	0.612299	0.485619	0.772024	3.35628e-05	0.00460134	GeneID:4113
PRP2	1.37145	1.18122	1.59231	3.38226e-05	0.00460134	GeneID:134285
CNOT8	0.42153	0.28017	0.634214	3.39949e-05	0.00460134	GeneID:9337
EEF1G	5.10604	2.36091	11.0431	3.43158e-05	0.00460134	GeneID:1937
FAM62C	1.19365	1.09757	1.29813	3.55326e-05	0.00471997	GeneID:83850
LOC161931	0.773499	0.68478	0.873713	3.59648e-05	0.00473314	GeneID:161931
FAM12A	0.628276	0.50386	0.783414	3.66018e-05	0.00477279	GeneID:10876
AAAS	0.64987	0.529238	0.797998	3.88994e-05	0.00502627	GeneID:8086
FLJ31951	2.30453	1.54727	3.43241	3.99968e-05	0.00503458	GeneID:153830
CHRFAM7A	0.769187	0.678638	0.871817	4.0139e-05	0.00503458	GeneID:89832
EIF3S5	0.702678	0.593708	0.831648	4.05734e-05	0.00503458	GeneID:8665
C16orf33	0.29108	0.161436	0.524835	4.06978e-05	0.00503458	GeneID:79622
CLK1	0.541808	0.40425	0.726174	4.10889e-05	0.00503458	GeneID:1195
FLJ32871	0.310429	0.177403	0.543202	4.17163e-05	0.00506776	GeneID:146279
MGC4399	0.790411	0.706206	0.884658	4.26958e-05	0.00510207	GeneID:84275
MYH2	0.816388	0.740736	0.899766	4.3358e-05	0.00510207	GeneID:4620
TEX101	0.728669	0.626075	0.848074	4.34346e-05	0.00510207	GeneID:83639
MAP2K2	1.49426	1.23204	1.81231	4.51369e-05	0.00525857	GeneID:5605
SPAM1	0.743376	0.644555	0.857348	4.60438e-05	0.00531851	GeneID:6677
DEFA6	0.744145	0.645353	0.858062	4.77452e-05	0.00531851	GeneID:1671
DLX3	3.25618	1.84239	5.75488	4.84313e-05	0.00531851	GeneID:1747
MARCKSL1	0.727044	0.623325	0.848023	4.92503e-05	0.00531851	GeneID:65108
CAMKK2	2.29601	1.53698	3.4299	4.9285e-05	0.00531851	GeneID:10645
TNFRSF21	4.14211	2.08532	8.22757	4.9303e-05	0.00531851	GeneID:27242
MAS1L	0.72527	0.621013	0.847029	4.97571e-05	0.00531851	GeneID:116511
ZGPAT	1.69832	1.31486	2.19362	4.98147e-05	0.00531851	GeneID:84619
ANKRD30A	0.761859	0.668028	0.868868	4.98757e-05	0.00531851	GeneID:91074
OPN4	0.706196	0.596901	0.835504	5.01418e-05	0.00531851	GeneID:94233
PLTP	1.13896	1.06953	1.2129	5.01525e-05	0.00531851	GeneID:5360
THSD1	0.683371	0.56847	0.821495	5.0452e-05	0.00531851	GeneID:55901
KCNK16	0.528753	0.388533	0.719579	5.05159e-05	0.00531851	GeneID:83795
CETP	0.753142	0.656597	0.863881	5.10964e-05	0.00534007	GeneID:1071
RAB27A	1.81947	1.36165	2.43123	5.17823e-05	0.00537225	GeneID:5873
PSMD2	2.49192	1.60086	3.87895	5.2512e-05	0.00538025	GeneID:5708
DAB2IP	1.12669	1.0634	1.19376	5.26165e-05	0.00538025	GeneID:153090
IFNA17	0.842038	0.774643	0.915298	5.35881e-05	0.00540219	GeneID:3451
MC3R	0.823867	0.749945	0.905076	5.35912e-05	0.00540219	GeneID:4159
ACRV1	0.751506	0.654123	0.863386	5.47105e-05	0.00547619	GeneID:56
ZNF584	1.42915	1.20141	1.70007	5.53427e-05	0.00550073	GeneID:201514
SLC12A1	0.77496	0.684486	0.877394	5.69542e-05	0.00561568	GeneID:6557
LZTS1	0.788222	0.701948	0.8851	5.72894e-05	0.00561568	GeneID:11178
NCF4	0.692838	0.579276	0.828664	5.877e-05	0.00570046	GeneID:4689
FLJ36180	0.831863	0.760401	0.910042	5.89565e-05	0.00570046	GeneID:339976
ERCC8	2.04235	1.44038	2.89591	6.11908e-05	0.00587652	GeneID:1161
DEFA3	0.754627	0.657364	0.866281	6.36158e-05	0.0060684	GeneID:1668
CPA5	0.825384	0.751219	0.90687	6.46812e-05	0.00608831	GeneID:93979
FGD4	1.19096	1.09304	1.29766	6.54102e-05	0.00611643	GeneID:121512
SLC22A2	0.672708	0.553614	0.817423	6.66487e-05	0.00612355	GeneID:6582
CTSH	0.565138	0.426895	0.748147	6.68435e-05	0.00612355	GeneID:1512
PEG10	0.392127	0.247414	0.621484	6.76624e-05	0.00612355	GeneID:23089
DCC	0.740347	0.638565	0.858353	6.77117e-05	0.00612355	GeneID:1630
CHRND	0.642047	0.516262	0.798478	6.80714e-05	0.00612355	GeneID:1144
CPNE3	0.15608	0.0625301	0.389589	6.89538e-05	0.00615211	GeneID:8895
TXNDC3	0.81956	0.743017	0.903989	6.95666e-05	0.00615211	GeneID:51314
CXorf48	0.734293	0.630621	0.855007	6.97227e-05	0.00615211	GeneID:54967
ZNF645	0.840104	0.77095	0.91546	7.02602e-05	0.00615211	GeneID:158506
MS4A6E	0.841575	0.772951	0.916292	7.0553e-05	0.00615211	GeneID:245802
SPINK1	0.539253	0.39754	0.731482	7.18423e-05	0.00620374	GeneID:6690
C7orf21	0.522546	0.379258	0.719971	7.21122e-05	0.00620374	GeneID:83590
IFNA21	0.847503	0.780989	0.919681	7.25207e-05	0.00620374	GeneID:3452
GJA3	0.772481	0.679971	0.877576	7.2891e-05	0.00620374	GeneID:2700
AGT	0.750099	0.650703	0.864677	7.3465e-05	0.00621537	GeneID:183
DCD	0.777153	0.686028	0.880383	7.42906e-05	0.00624803	GeneID:117159
FLJ30313	0.783551	0.694336	0.88423	7.65403e-05	0.00639937	GeneID:253868
REG1B	0.842527	0.773859	0.917289	7.80328e-05	0.006486	GeneID:5968
LRRC7	0.7681	0.673795	0.875603	7.89185e-05	0.00648848	GeneID:57554
MUC1	0.23436	0.114009	0.481757	7.93097e-05	0.00648848	GeneID:4582
OAZ2	0.570644	0.43183	0.75408	7.98752e-05	0.00648848	GeneID:4947
VENTX	0.743085	0.641101	0.861293	8.0628e-05	0.00648848	GeneID:27287
AGTRL1	0.825444	0.750277	0.908141	8.21571e-05	0.00648848	GeneID:187
GUCA2B	0.674516	0.554385	0.820679	8.32435e-05	0.00648848	GeneID:2981
GRK1	0.477057	0.329956	0.689737	8.32914e-05	0.00648848	GeneID:6011
CASP8	0.868149	0.809101	0.931506	8.34448e-05	0.00648848	GeneID:841
KRTAP9-3	0.788858	0.700936	0.887808	8.36187e-05	0.00648848	GeneID:83900
AEBP1	1.17265	1.08317	1.26953	8.40029e-05	0.00648848	GeneID:165
EIF2S3	0.555799	0.414718	0.744874	8.43859e-05	0.00648848	GeneID:1968
PRKCD	6.05344	2.46644	14.8571	8.46831e-05	0.00648848	GeneID:5580
FLJ30834	0.802439	0.718986	0.895578	8.55076e-05	0.00648848	GeneID:132332
ZFYVE16	2.9429	1.71715	5.04362	8.5996e-05	0.00648848	GeneID:9765
IGFBP7	1.13631	1.06604	1.21122	8.73341e-05	0.00648848	GeneID:3490
CHST12	1.7672	1.3294	2.34918	8.84073e-05	0.00648848	GeneID:55501
PSG5	0.704796	0.591647	0.839584	8.91694e-05	0.00648848	GeneID:5673
NOLA2	0.724423	0.61653	0.851196	8.92443e-05	0.00648848	GeneID:55651
GORASP1	0.642591	0.515041	0.801729	8.9454e-05	0.00648848	GeneID:64689
